# Supplementary material for: Active coacervate droplets as a model for membraneless organelles and protocells
Source: Springer Nature journal article supplement (doi:10.1038/s41467-020-18815-9), 2020-10-14
Supplement: MOESM3 [file 41467_2020_18815_MOESM3_ESM.pdf]

## **Descriptions of Additional Supplementaty Files**

### **Supplementary Movie 1**

**Description:** Confocal microscopy timeseries of 23 mM precursor and 4.1 mM poly-U (Cy3-A15 hybridized) after the addition of 25 mM EDC. The complete cycle of dynamic droplets is shown.

### **Supplementary Movie 2**

**Description:** Confocal microscopy timeseries of 23 mM precursor and 4.1 mM poly-U (Cy3-A15 hybridized) after the addition of 25 mM EDC. Vacuole formation in dynamic droplets is shown.

### **Supplementary Movie 3**

**Description:** Confocal microscopy timeseries of 23 mM precursor and 4.1 mM poly-U (Cy3-A15 hybridized) after the addition of 25 mM EDC. Loss of mini-fragments of a single droplet is shown.

### **Supplementary Movie 4**

**Description:** Confocal microscopy timeseries of 23 mM precursor and 4.1 mM poly-U (Cy3-A15 hybridized) after the addition of 25 mM EDC. Fragmentation of several droplets can be seen.
